# Supplementary material
Source: publisher site journal article supplement (https://www.dovepress.com/article/308986)
Supplement: Supplementary file 1 [file get_supplementary_file.php]

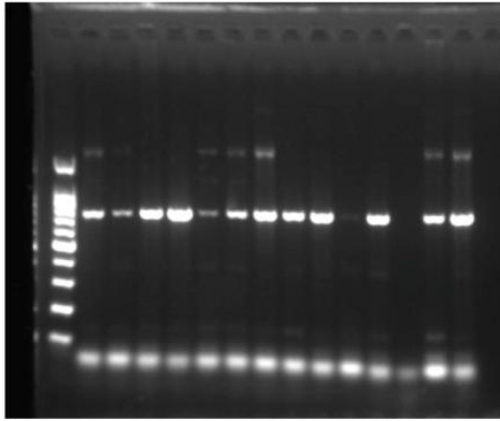

**Myc**

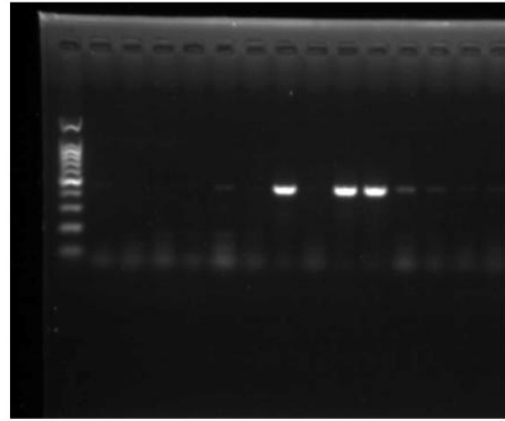

**Alb**

**Supplemental Figure 1 The gene identification results of Alb-cre;Myc mice and wild-type (WT) mice.**

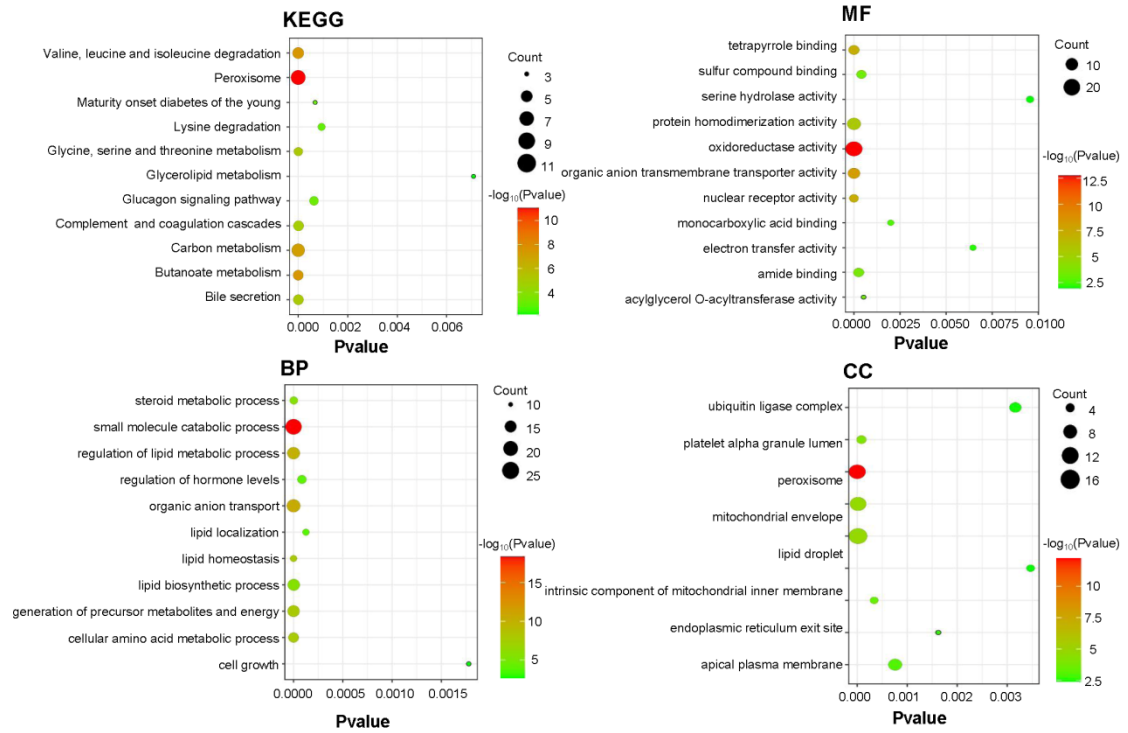

## Supplemental Figure 2 Functional enrichment analysis of SLC6A1:

Functional enrichment analysis (including Gene ontology and KEGG pathway) of SLC6A1-related 200 genes from the GEPIA database.

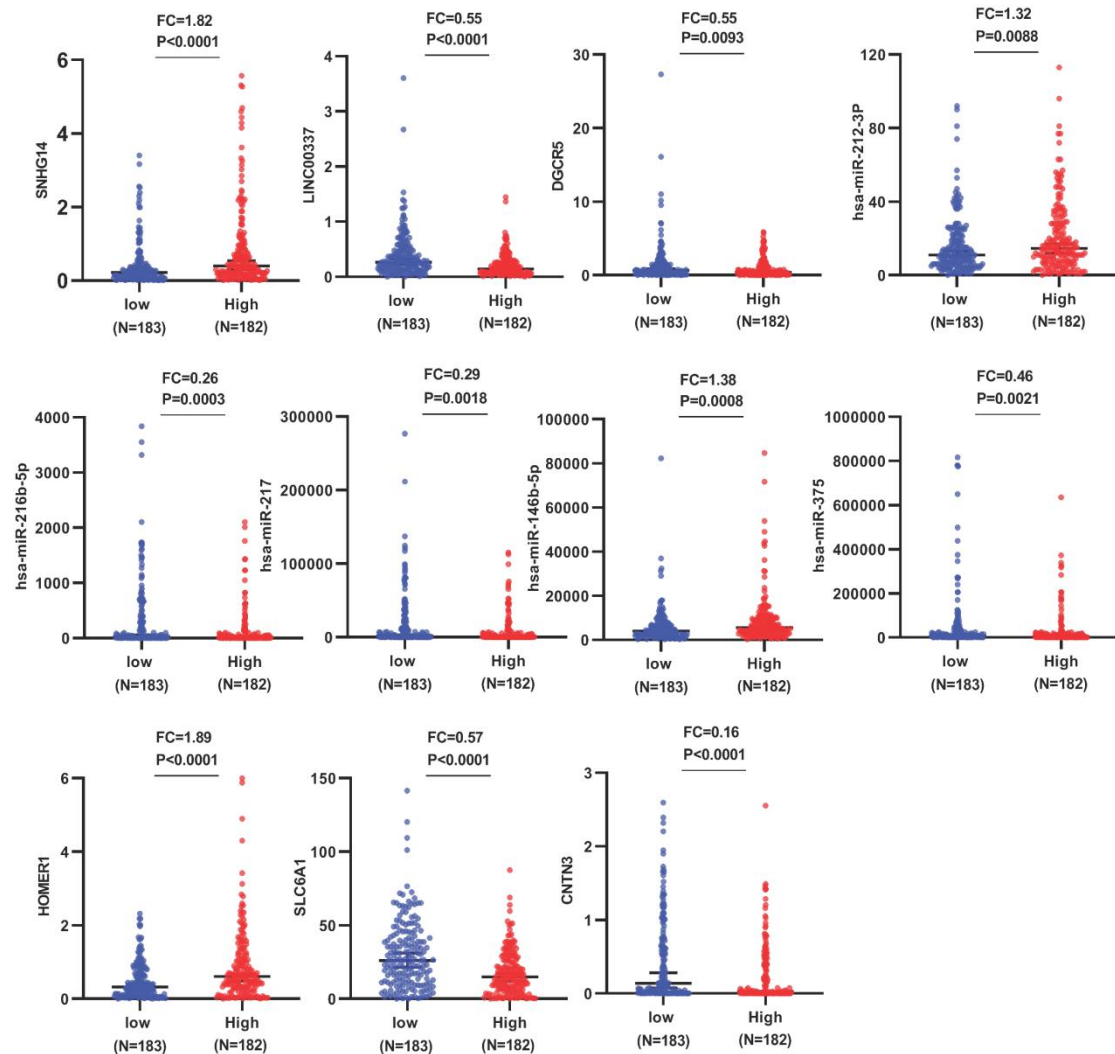

**Supplemental Figure 3 The RNA expression analysis of a hub triple regulatory network:**

Comparison between low-Myc expression and high-Myc expression groups:

1 up-regulated (SNHG14) and 2 down-regulated (LINC00337, DGCR5)

lncRNAs, 2 up-regulated (miR-212-3p, miR-146b-5p) and 3 down-regulated

(miR-216b-5p, miR-217, miR-375) miRNAs, 1 up-regulated (HOMER1) and 2

down-regulated (SLC6A1, CNTN3) mRNAs in HCC samples.

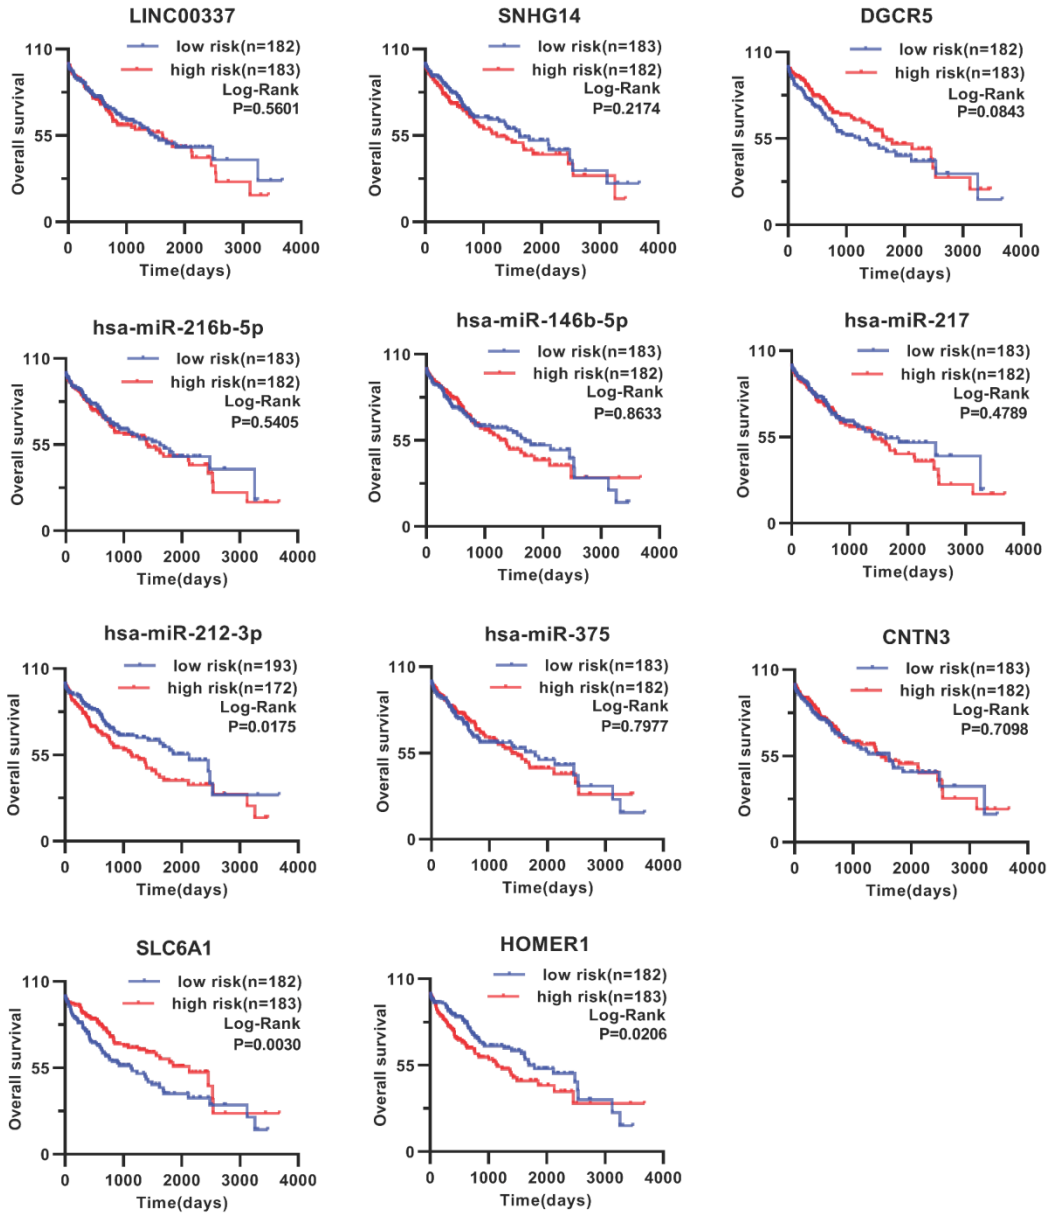

**Supplemental Figure 4 The overall survival (OS) analysis of a hub triple regulatory network:**

Comparison between low-Myc expression and high-Myc expression groups:

1DEmiRNAs (miR-212-3p) and 2 DEmRNAs (SLC6A1, HOMER1) were found to be significantly associated with prognosis in HCC samples.

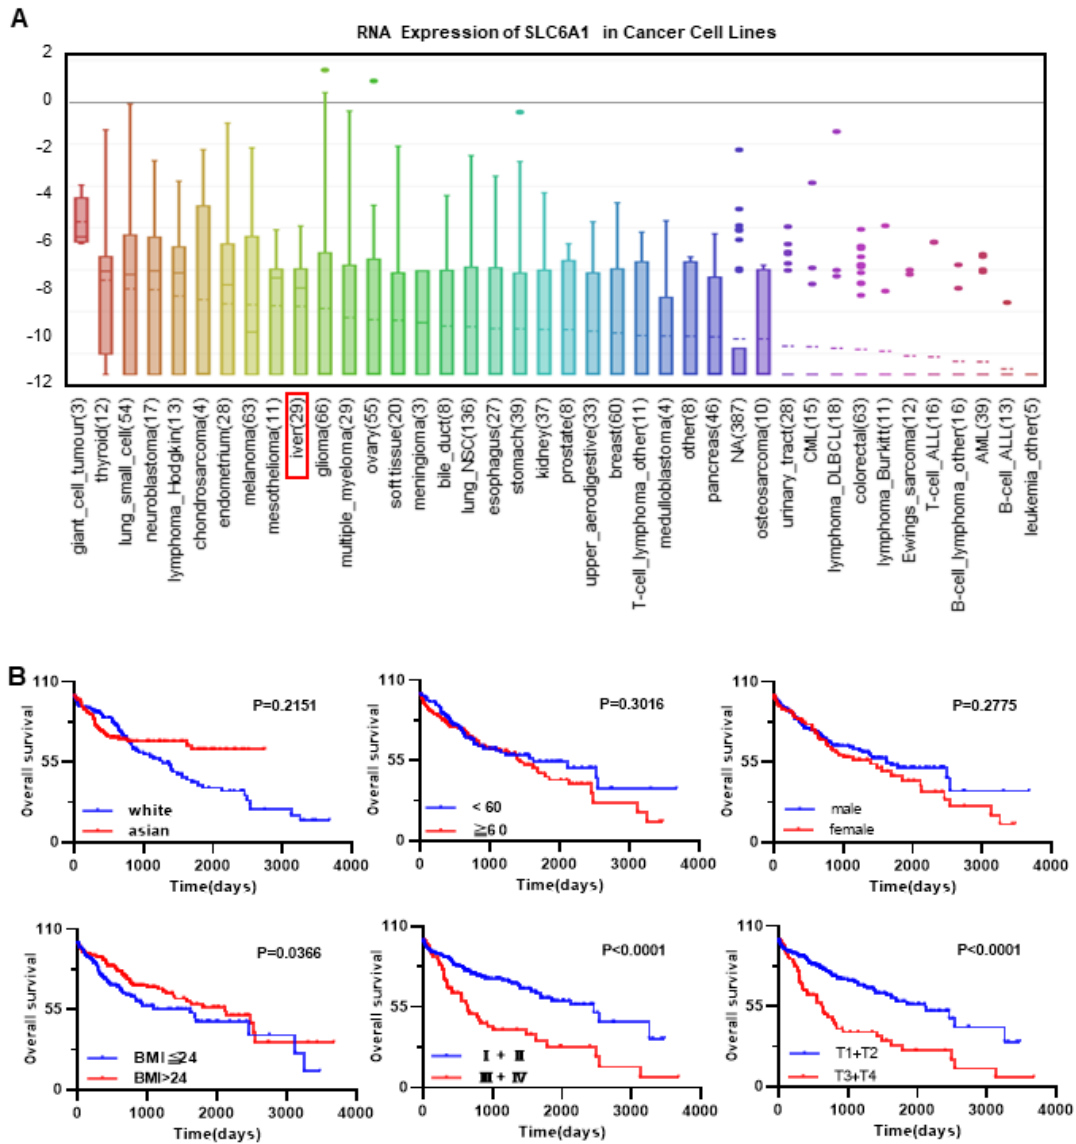

**Supplemental Figure 5**

(A) The RNA expression distribution of SLC6A1 in pan-cancer cell lines by CCLE database. (B) The prognostic significance of the clinicopathologic features (including race, age, gender, BMI, TNM stage and tumor diameter).

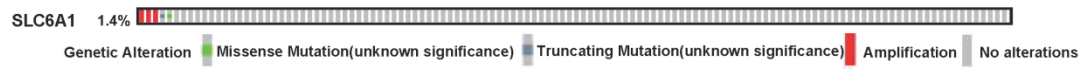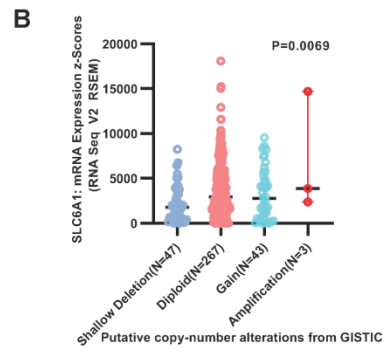

**Supplemental Figure 6 The genetic alterations distribution of SLC6A1 in 360 HCC samples by cbiportal database.**

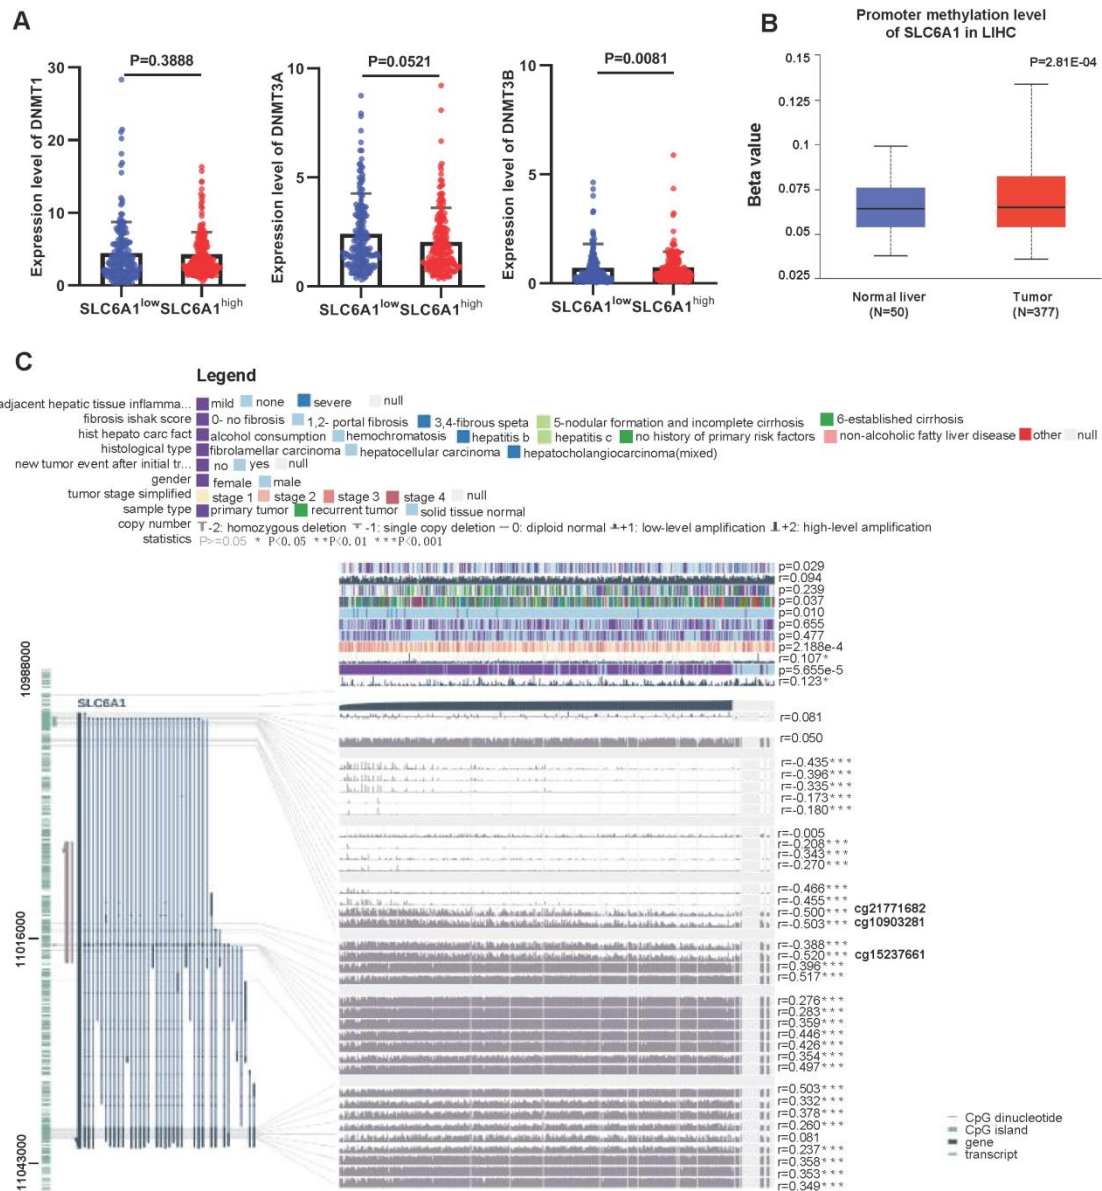

Supplemental Figure 7 Associated SLC6A1 with methylation analysis:

(A) The methylation expression of SLC6A1 in HCC tissues using the UALCAN database (B) The SLC6A1 expression was negatively correlated with DNA methylation, Pearson's correlation coefficients and P values for methylation sites are shown on the right side.

**Table S1 Top 10 genes by twelve ranked methods respectively in cytoHubba**

| mRNA          | Betweenness     | BottleNeck | Closeness    | Clustering Coefficient | Degree   | DMNC     | EcCentricity | EPC           | MCC      | MNC      | Radiality      | Stress     |
|---------------|-----------------|------------|--------------|------------------------|----------|----------|--------------|---------------|----------|----------|----------------|------------|
| SEC14L2       | 0               | 1          | 18.33333     | 0                      | 1        | 0        | 0.25         | 7.653         | 1        | 1        | 2.06122        | 0          |
| SLC26A7       | 73.29091        | 1          | 22           | 0                      | 2        | 0        | 0.25         | 12.276        | 2        | 1        | 2.59184        | 430        |
| TAF4B         | 0               | 1          | 18.33333     | 0                      | 1        | 0        | 0.25         | 8.063         | 1        | 1        | 2.06122        | 0          |
| <b>SLC6A1</b> | <b>55.39394</b> | <b>1</b>   | <b>21.75</b> | <b>0</b>               | <b>2</b> | <b>0</b> | <b>0.25</b>  | <b>12.898</b> | <b>2</b> | <b>1</b> | <b>2.55102</b> | <b>376</b> |
| E2F5          | 0               | 1          | 18.33333     | 0                      | 1        | 0        | 0.25         | 8.092         | 1        | 1        | 2.06122        | 0          |
| NCKAP5        | 0               | 1          | 18.33333     | 0                      | 1        | 0        | 0.25         | 8.202         | 1        | 1        | 2.06122        | 0          |
| FAM167A       | 0               | 1          | 18.33333     | 0                      | 1        | 0        | 0.25         | 8.012         | 1        | 1        | 2.06122        | 0          |
| <b>CNTN3</b>  | <b>54.23636</b> | <b>1</b>   | <b>21</b>    | <b>0</b>               | <b>2</b> | <b>0</b> | <b>0.25</b>  | <b>12.403</b> | <b>2</b> | <b>1</b> | <b>2.42857</b> | <b>326</b> |
| CNTNAP3       | 0               | 1          | 18.33333     | 0                      | 1        | 0        | 0.25         | 8.101         | 1        | 1        | 2.06122        | 0          |
| <b>HOMER1</b> | <b>55.39394</b> | <b>1</b>   | <b>21.75</b> | <b>0</b>               | <b>2</b> | <b>0</b> | <b>0.25</b>  | <b>12.544</b> | <b>2</b> | <b>1</b> | <b>2.55102</b> | <b>376</b> |



**Table S2 The IHC data were yielded and analysed for liver cancer tissues from the Human Protein Atlas database**

| <b>Group</b>                    | <b>The number of samples</b> | <b>Percentage (%)</b> |
|---------------------------------|------------------------------|-----------------------|
| SLC6A1 staining                 |                              |                       |
| High                            | 0                            | 0                     |
| Medium                          | 5                            | 5 (5 of 28)           |
| Low                             | 3                            | 3 (3 of 28)           |
| Not detected                    | 20                           | 20 (20 of 28)         |
| SLC6A1 intensity                |                              |                       |
| Strong                          | 0                            | 0                     |
| Moderate                        | 7                            | 7 (7 of 28)           |
| Weak                            | 3                            | 3 (3 of 28)           |
| Negative                        | 18                           | 18 (18 of 28)         |
| SLC6A1 quantity                 |                              |                       |
| >75%                            | 4                            | 4 (4 of 28)           |
| 75%-25%                         | 2                            | 2 (2 of 28)           |
| <25%                            | 4                            | 4 (4 of 28)           |
| None                            | 18                           | 18 (18 of 28)         |
| SLC6A1 location                 |                              |                       |
| Nuclear                         | 0                            | 0                     |
| Cytoplasmic/membranous          | 10                           | 10 (10 of 28)         |
| Cytoplasmic/membranous, nuclear | 0                            | 0                     |
| None                            | 18                           | 18 (18 of 28)         |

**Table. S3 IHC of SLC6A1 in Human Protein Atlas database.**

| NO. | Tissue type | ID   | Age | Gender | Staining     |
|-----|-------------|------|-----|--------|--------------|
| 1   | Normal      | 1720 | 67  | Male   | Medium       |
| 2   | Normal      | 3402 | 54  | Female | Medium       |
| 3   | Tumor       | 2177 | 58  | Female | Not detected |
| 4   | Tumor       | 3196 | 65  | Male   | Not detected |

**Table S4 Univariate analysis of overall survival in LHC patients stratified based on clinical characteristics**

---

| Factor | Variable | N | SLC6A1 | P value | Overall survival |
|--------|----------|---|--------|---------|------------------|
|--------|----------|---|--------|---------|------------------|

---

|                       |          |     | median |              | Months<br>(median) | 95%CI       | P value<br>(Log-rank<br>test) |
|-----------------------|----------|-----|--------|--------------|--------------------|-------------|-------------------------------|
| Age                   |          |     |        |              |                    |             |                               |
|                       | ≥ 60     | 198 | 19.72  | 0.517        | 21.02              | 17.30-23.10 | 0.302                         |
|                       | <60      | 167 | 18.29  |              | 18.53              | 15.73-20.90 |                               |
| Gender                |          |     |        |              |                    |             |                               |
|                       | male     | 247 | 17.96  | 0.186        | 19.13              | 15.93-21.20 | 0.278                         |
|                       | female   | 118 | 22.87  |              | 20.98              | 18.50-25.67 |                               |
| BMI                   |          |     |        |              |                    |             |                               |
|                       | <18.5    | 21  | 12.00  | <b>0.006</b> | 19.57              | 12.17-30.33 | 0.087                         |
|                       | 18.5-24  | 136 | 16.82  |              | 15.62              | 13.53-19.60 |                               |
|                       | 24-28    | 82  | 23.29  |              | 21.37              | 18.73-25,50 |                               |
|                       | ≥ 28     | 92  | 21.05  |              | 23.70              | 18.60-27.63 |                               |
| TNM stage             |          |     |        |              |                    |             |                               |
|                       | I - II   | 252 | 20.01  | <b>0.024</b> | 20.17              | 18.50-22.67 | <b>0.000</b>                  |
|                       | III-IV   | 89  | 16.27  |              | 13.60              | 11.63-18.60 |                               |
| Diameter              |          |     |        |              |                    |             |                               |
|                       | < 5cm    | 270 | 20.57  | <b>0.010</b> | 21.02              | 19.17-23.10 | <b>0.000</b>                  |
|                       | ≥ 5cm    | 92  | 15.07  |              | 13.60              | 11.63-18.60 |                               |
| Lymph-node metastasis |          |     |        |              |                    |             |                               |
|                       | Negative | 249 | 18.29  | 0.227        | 19.37              | 17.07-21.83 | 0.115                         |
|                       | Positive | 4   | 15.77  |              | 21.75              | 0.50-33.60  |                               |
|                       | Unknown  | 111 | 21.93  |              | 20.03              | 14.60-23.10 |                               |
| Distant metastasis    |          |     |        |              |                    |             |                               |
|                       | Negative | 263 | 17.36  | 0.062        | 19.37              | 16.00-21.63 | <b>0.004</b>                  |
|                       | Positive | 4   | 22.90  |              | 13.02              | 0.00-31.03  |                               |
|                       | Unknown  | 98  | 22.51  |              | 20.38              | 16.67-23.53 |                               |

**Table S5 Correlation analysis between SEC14L2/SLC6A1 and biomarkers  
of immune cells in HCC**

| Description      | Gene markers       | SLC6A1 |          |
|------------------|--------------------|--------|----------|
|                  |                    | Cor    | P        |
| CD8+ T cell      | CD8A               | -0.129 | 1.32e-02 |
|                  | CD8B               | -0.239 | 3.19e-06 |
| T cell (general) | CD3D               | -0.3   | 4.3e-09  |
|                  | CD3E               | -0.195 | 1.6e-04  |
|                  | CD2                | -0.203 | 8.81e-05 |
| B cell           | CD19               | -0.121 | 1.96e-02 |
|                  | CD79A              | -0.136 | 8.84e-03 |
| Monocyte         | CD86               | -0.235 | 5.04e-06 |
|                  | CD115 (CSF1R)      | -0.253 | 8.76e-07 |
| TAM              | CCL2               | -0.133 | 1.05e-02 |
|                  | CD68               | -0.292 | 1.21e-08 |
|                  | IL10               | -0.156 | 2.51e-03 |
| M1 Macrophage    | INOS (NOS2)        | 0.243  | 2.15e-06 |
|                  | IRF5               | 0.139  | 7.13e-03 |
|                  | COX2 (PTGS2)       | -0.099 | 5.79e-02 |
| M2 Macrophage    | CD163              | -0.061 | 2.38e-01 |
|                  | VSIG4              | -0.15  | 3.92e-03 |
|                  | MS4A4A             | -0.148 | 4.37e-03 |
| Neutrophils      | CD66b<br>(CEACAM8) | -0.073 | 1.61e-01 |
|                  | CD11b (ITGAM)      | -0.14  | 7.09e-03 |
|                  | CCR7               | -0.042 | 4.2e-01  |

|                     |                      |        |          |
|---------------------|----------------------|--------|----------|
| Natural killer cell | KIR2DL1              | -0.004 | 9.37e-01 |
|                     | KIR2DL3              | 0.003  | 9.59e-01 |
|                     | KIR2DL4              | -0.171 | 9.55e-04 |
|                     | KIR3DL1              | 0.039  | 4.59e-01 |
|                     | KIR3DL2              | -0.05  | 3.33e-01 |
|                     | KIR3DL3              | -0.003 | 9.58e-01 |
|                     | KIR2DS4              | 0.017  | 7.48e-01 |
| Dendritic cell      | HLA-DPB1             | -0.256 | 6.23e-07 |
|                     | HLA-DQB1             | -0.23  | 8.06e-06 |
|                     | HLA-DRA              | -0.208 | 5.7e-05  |
|                     | HLA-DPA1             | -0.164 | 1.6e-03  |
|                     | BDCA-1(CD1C)         | -0.043 | 4.12e-01 |
|                     | BDCA-4(NRP1)         | -0.046 | 3.79e-01 |
|                     | CD11c(ITGAX)         | -0.156 | 2.6e-03  |
|                     |                      |        |          |
| Th1                 | T-bet (TBX21)        | -0.071 | 1.7e-01  |
|                     | STAT4                | 0.006  | 9.05e-01 |
|                     | STAT1                | 0.05   | 3.41e-01 |
|                     | IFN- $\gamma$ (IFNG) | -0.149 | 4.01e-03 |
|                     | TNF- $\alpha$ (TNF)  | -0.146 | 4.92e-03 |
| Th2                 | GATA3                | -0.145 | 5e-03    |
|                     | STAT6                | 0.159  | 2.19e-03 |
|                     | STAT5A               | -0.09  | 8.2e-02  |
|                     | IL13                 | 0.189  | 2.56e-04 |
| Tfh                 | BCL6                 | 0.081  | 1.19e-01 |
|                     | IL21                 | -0.026 | 6.24e-01 |
| Th17                | STAT3                | 0.075  | 1.5e-01  |
|                     | IL17A                | 0.04   | 4.43e-01 |

|                   |                     |        |          |
|-------------------|---------------------|--------|----------|
| Treg              | FOXP3               | 0.276  | 6.83e-08 |
|                   | CCR8                | 0.044  | 3.97e-01 |
|                   | STAT5B              | 0.423  | 0e+00    |
|                   | TGF $\beta$ (TGFB1) | -0.243 | 2.34e-06 |
| T cell exhaustion | PD-1 (PDCD1)        | -0.245 | 1.75e-06 |
|                   | CTLA4               | -0.301 | 3.4e-09  |
|                   | LAG3                | -0.159 | 2.08e-03 |
|                   | TIM-3<br>(HAVCR2)   | -0.248 | 1.49e-06 |
|                   | GZMB                | -0.196 | 1.48e-04 |

---

**Table S6 Correlation analysis between SLC6A1 and biomarkers of T cell (general), monocyte, TAM and T cell exhaustion in GEPIA**

| Description       | Gene markers        | LIHC(SLC6A1) |         |        |       |
|-------------------|---------------------|--------------|---------|--------|-------|
|                   |                     | Tumor        |         | Normal |       |
|                   |                     | R            | P       | R      | P     |
| T cell (general)  | CD3D                | -0.33        | 1.4e-10 | -0.00  | 0.99  |
|                   | CD3E                | -0.18        | 0.0005  | 0.09   | 0.55  |
|                   | CD2                 | -0.19        | 0.0003  | 0.11   | 0.44  |
| Monocyte          | CD86                | -0.20        | 0.0002  | -0.03  | 0.83  |
|                   | CD115 (CSF1R)       | -0.19        | 0.0002  | 0.11   | 0.43  |
| TAM               | CCL2                | -0.12        | 0.027   | -0.37  | 0.008 |
|                   | CD68                | -0.22        | 2.5e-05 | 0.015  | 0.92  |
|                   | IL10                | -0.05        | 0.3     | 0.13   | 0.38  |
| Treg              | STAT5B              | 0.46         | 2.2e-20 | 0.39   | 0.006 |
|                   | TGF $\beta$ (TGFB1) | -0.31        | 1e-09   | -0.1   | 0.48  |
| T cell exhaustion | PD-1 (PDCD1)        | -0.22        | 1.7e-05 | 0.13   | 0.36  |
|                   | CTLA4               | -0.27        | 1.8e-07 | 0.03   | 0.82  |
|                   | LAG3                | -0.17        | 0.00095 | 0.09   | 0.55  |
|                   | TIM-3 (HAVCR2)      | -0.23        | 9.4e-06 | -0.16  | 0.27  |
|                   | GZMB                | -0.23        | 7.4e-06 | -0.015 | 0.92  |
